# Supplementary material
Source: ML conference proceedings conference paper supplement (https://openreview.net/forum?id=lVsBYHcncs)
Supplement: supplementary_material [file attachment]

UE: choose  $x_1$  that minimizes the surrogate model of  $f(x)$

Epoch 1:

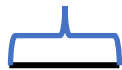

Epoch Length: 1

LE: choose  $x_2$  that minimizes the surrogate model of  $f(x) + c(x, v_2)$

Epoch 2:  $v_2 = \operatorname{argmin}_{x_t} \{f(x_t) + \varepsilon_t | t = 1\}$

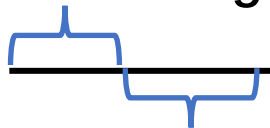

Epoch Length: 2

.....

UE: choose  $x_3$  that minimizes the surrogate model of  $f(x)$

Epoch  $m$ :

$v_m = \operatorname{argmin}_{x_t} \{f(x_t) + \varepsilon_t | t = 1, \dots, \frac{m(m-1)}{2}\}$

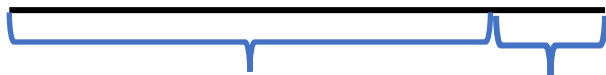

Epoch Length:  $m$

LE: the first  $m - 1$   
iterations

UE: the last  
iteration
