# Supplementary material
Source: ML conference proceedings conference paper supplement (https://openreview.net/forum?id=lVsBYHcncs)

time-averaged total cost

$10^3$   
 $\times 10^2$

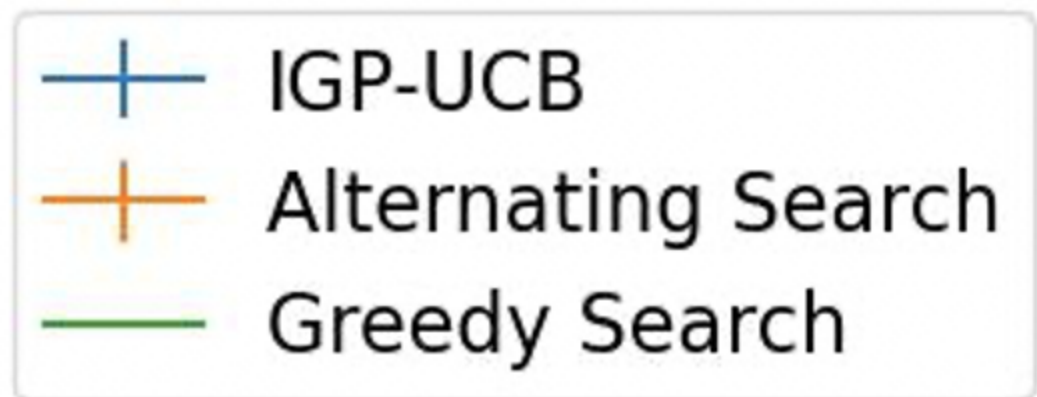

iterations

Supplement: supplementary_material [file attachment]

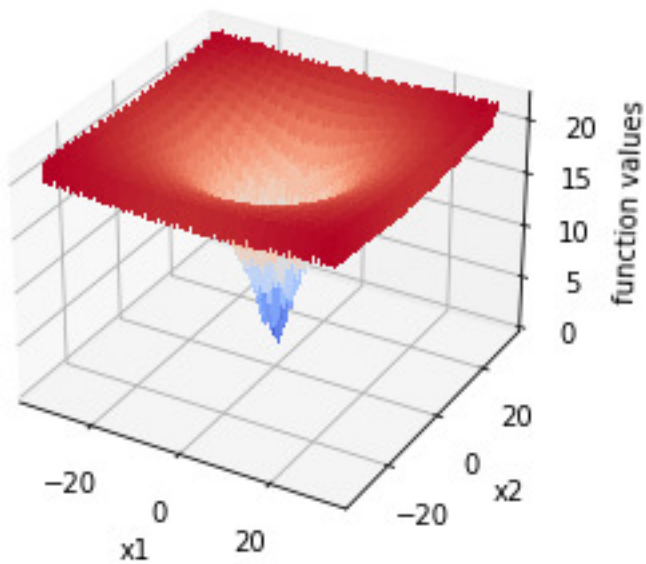

Supplement: supplementary_material [file attachment]

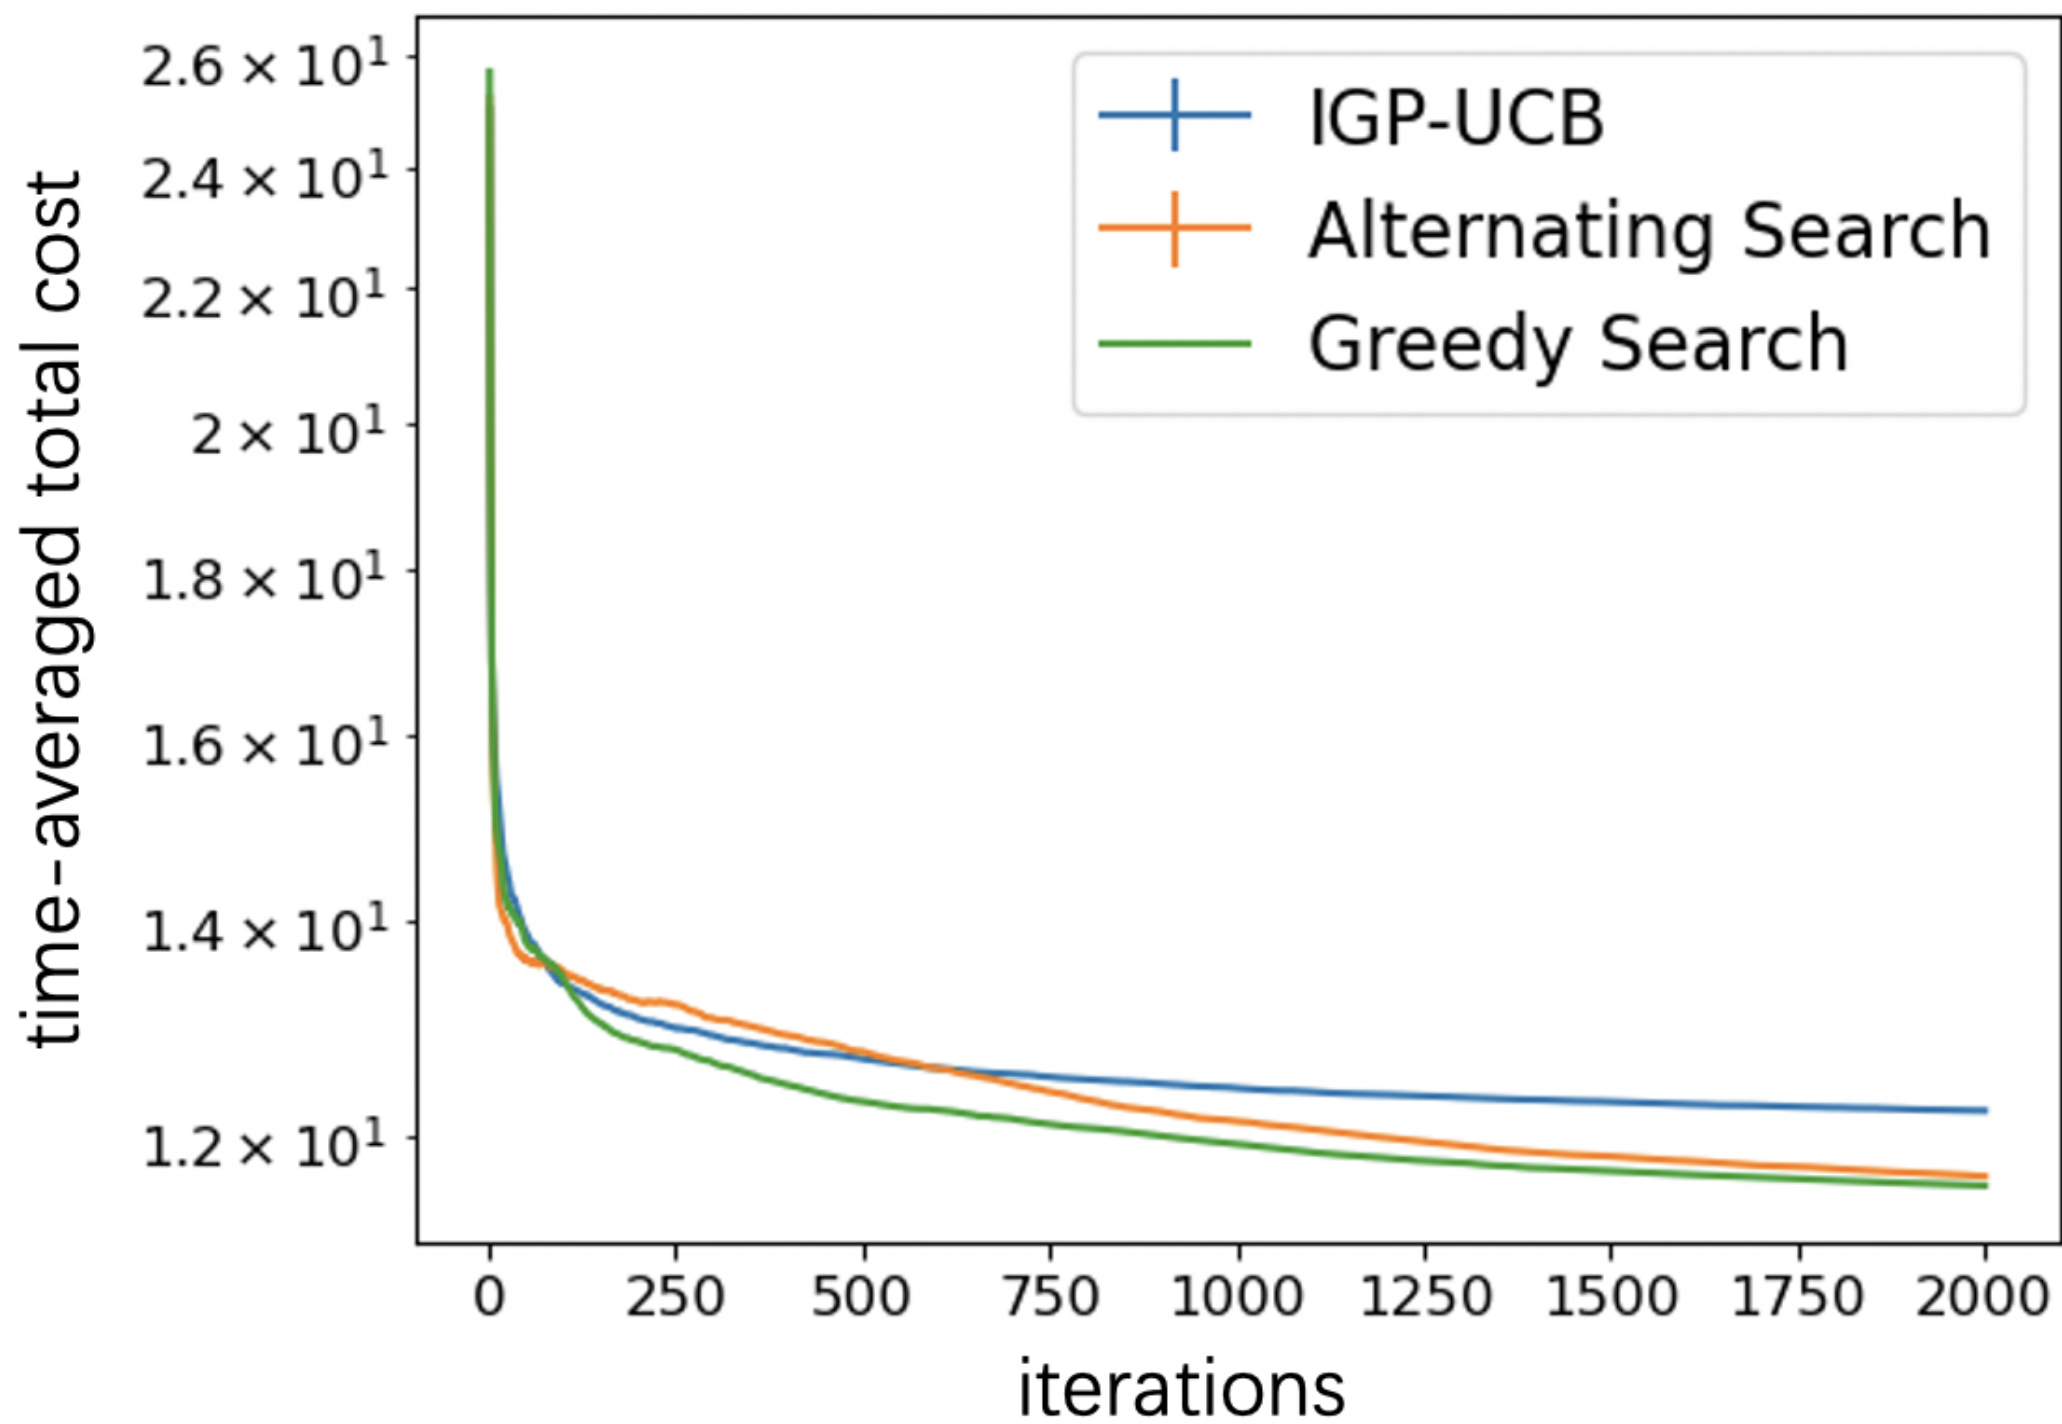

Supplement: supplementary_material [file attachment]
